# Supplementary material for: Antioxidation and Cytoprotection of Acteoside and Its Derivatives: Comparison and Mechanistic Chemistry
Source: MDPI journal article supplement (doi:10.3390/molecules23020498), 2018-02-23
Supplement: s1 [file s1]

## CERTIFICATE OF ANALYSIS

**BBP No.:** BBP00491

**CAS No.:** 61276-17-3

**Chemical Name:** Acteoside

**Molecular Formula:** C<sub>29</sub>H<sub>36</sub>O<sub>15</sub>

**Structure:**

**Purity:** 95%

**Appearance:** Powder

**Solvent:** Methanol

**Exact Weight:** 5.1 mg

**Storage:** Store in a dark place under the temperature of 0-4 °C

**Intended Use:** For laboratory use only

**Reference:** H. Kobayashi, et al., Chem. Pharm. Bull., 1984, 32(8), 3009-3014

**Warm Notice:** When publishing, please cite as: chemical name was purchased from BioBioPha Co., Ltd. (Kunming, China)

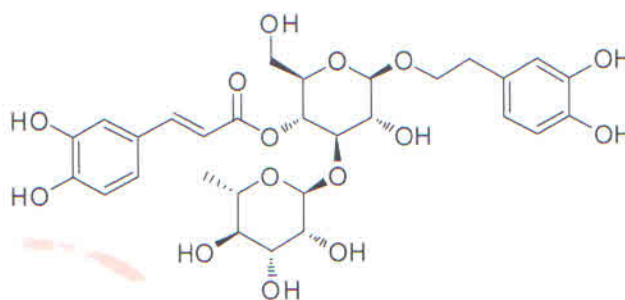

### Characterization Data Summary

| Analytical Test                           | Results                             |
|-------------------------------------------|-------------------------------------|
| Identification by <sup>1</sup> H-NMR      | Consistent with the above structure |
| Purity tested by HPLC, <sup>1</sup> H-NMR | 95%                                 |

**Authorized Signature:** T-ei Wang

**Date:** 2016.11.2

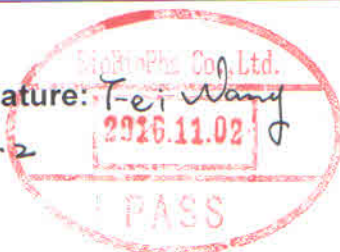

## PRODUCT QUALITY REPORT

Product Number: BBP00491

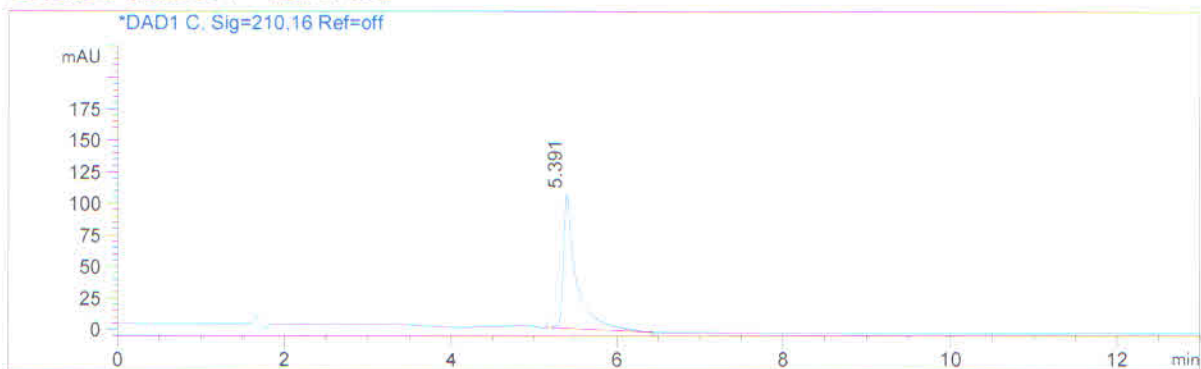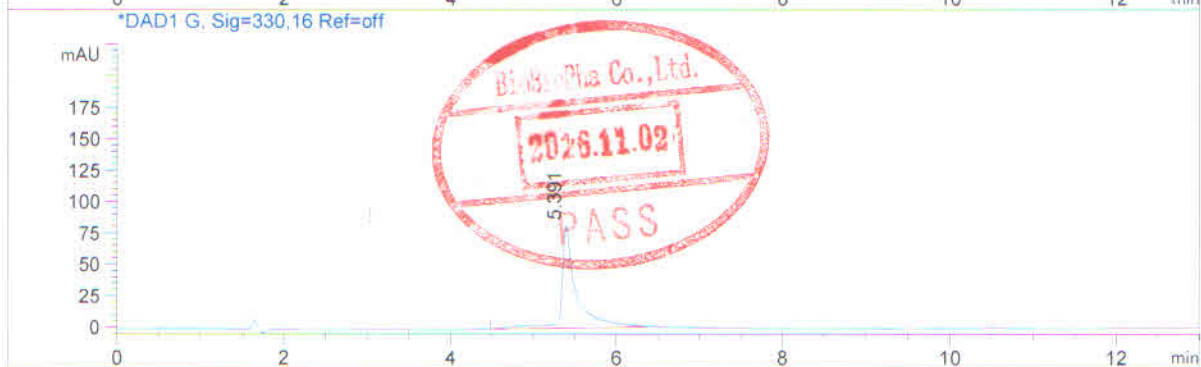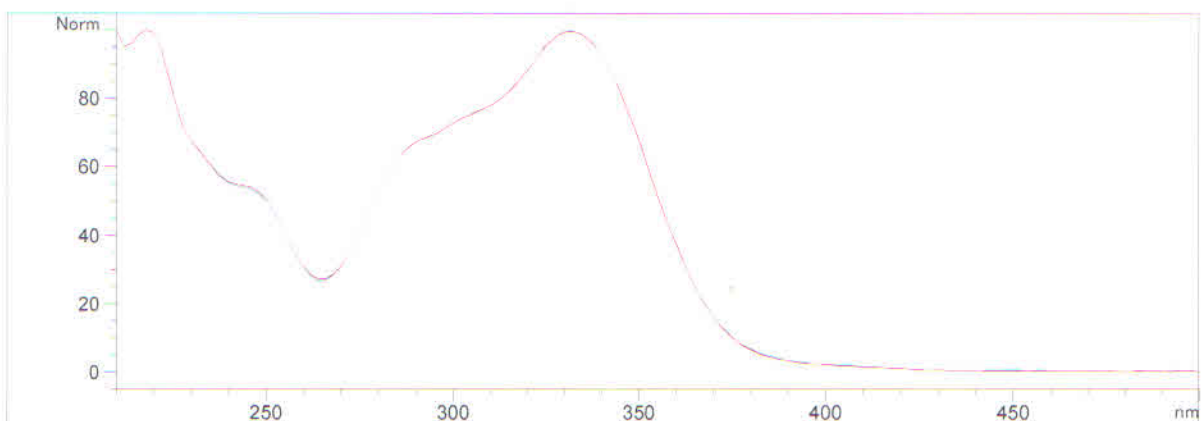

Agilent 1200 series HPLC system  
Thermo Hypersil BDS C18 column (5  $\mu$ m, 4.6  $\times$  150 mm)  
20% $\rightarrow$ 100% MeOH in H<sub>2</sub>O over 8 min followed by 100% MeOH to 13.0 min  
1.0 ml/min, 25°C

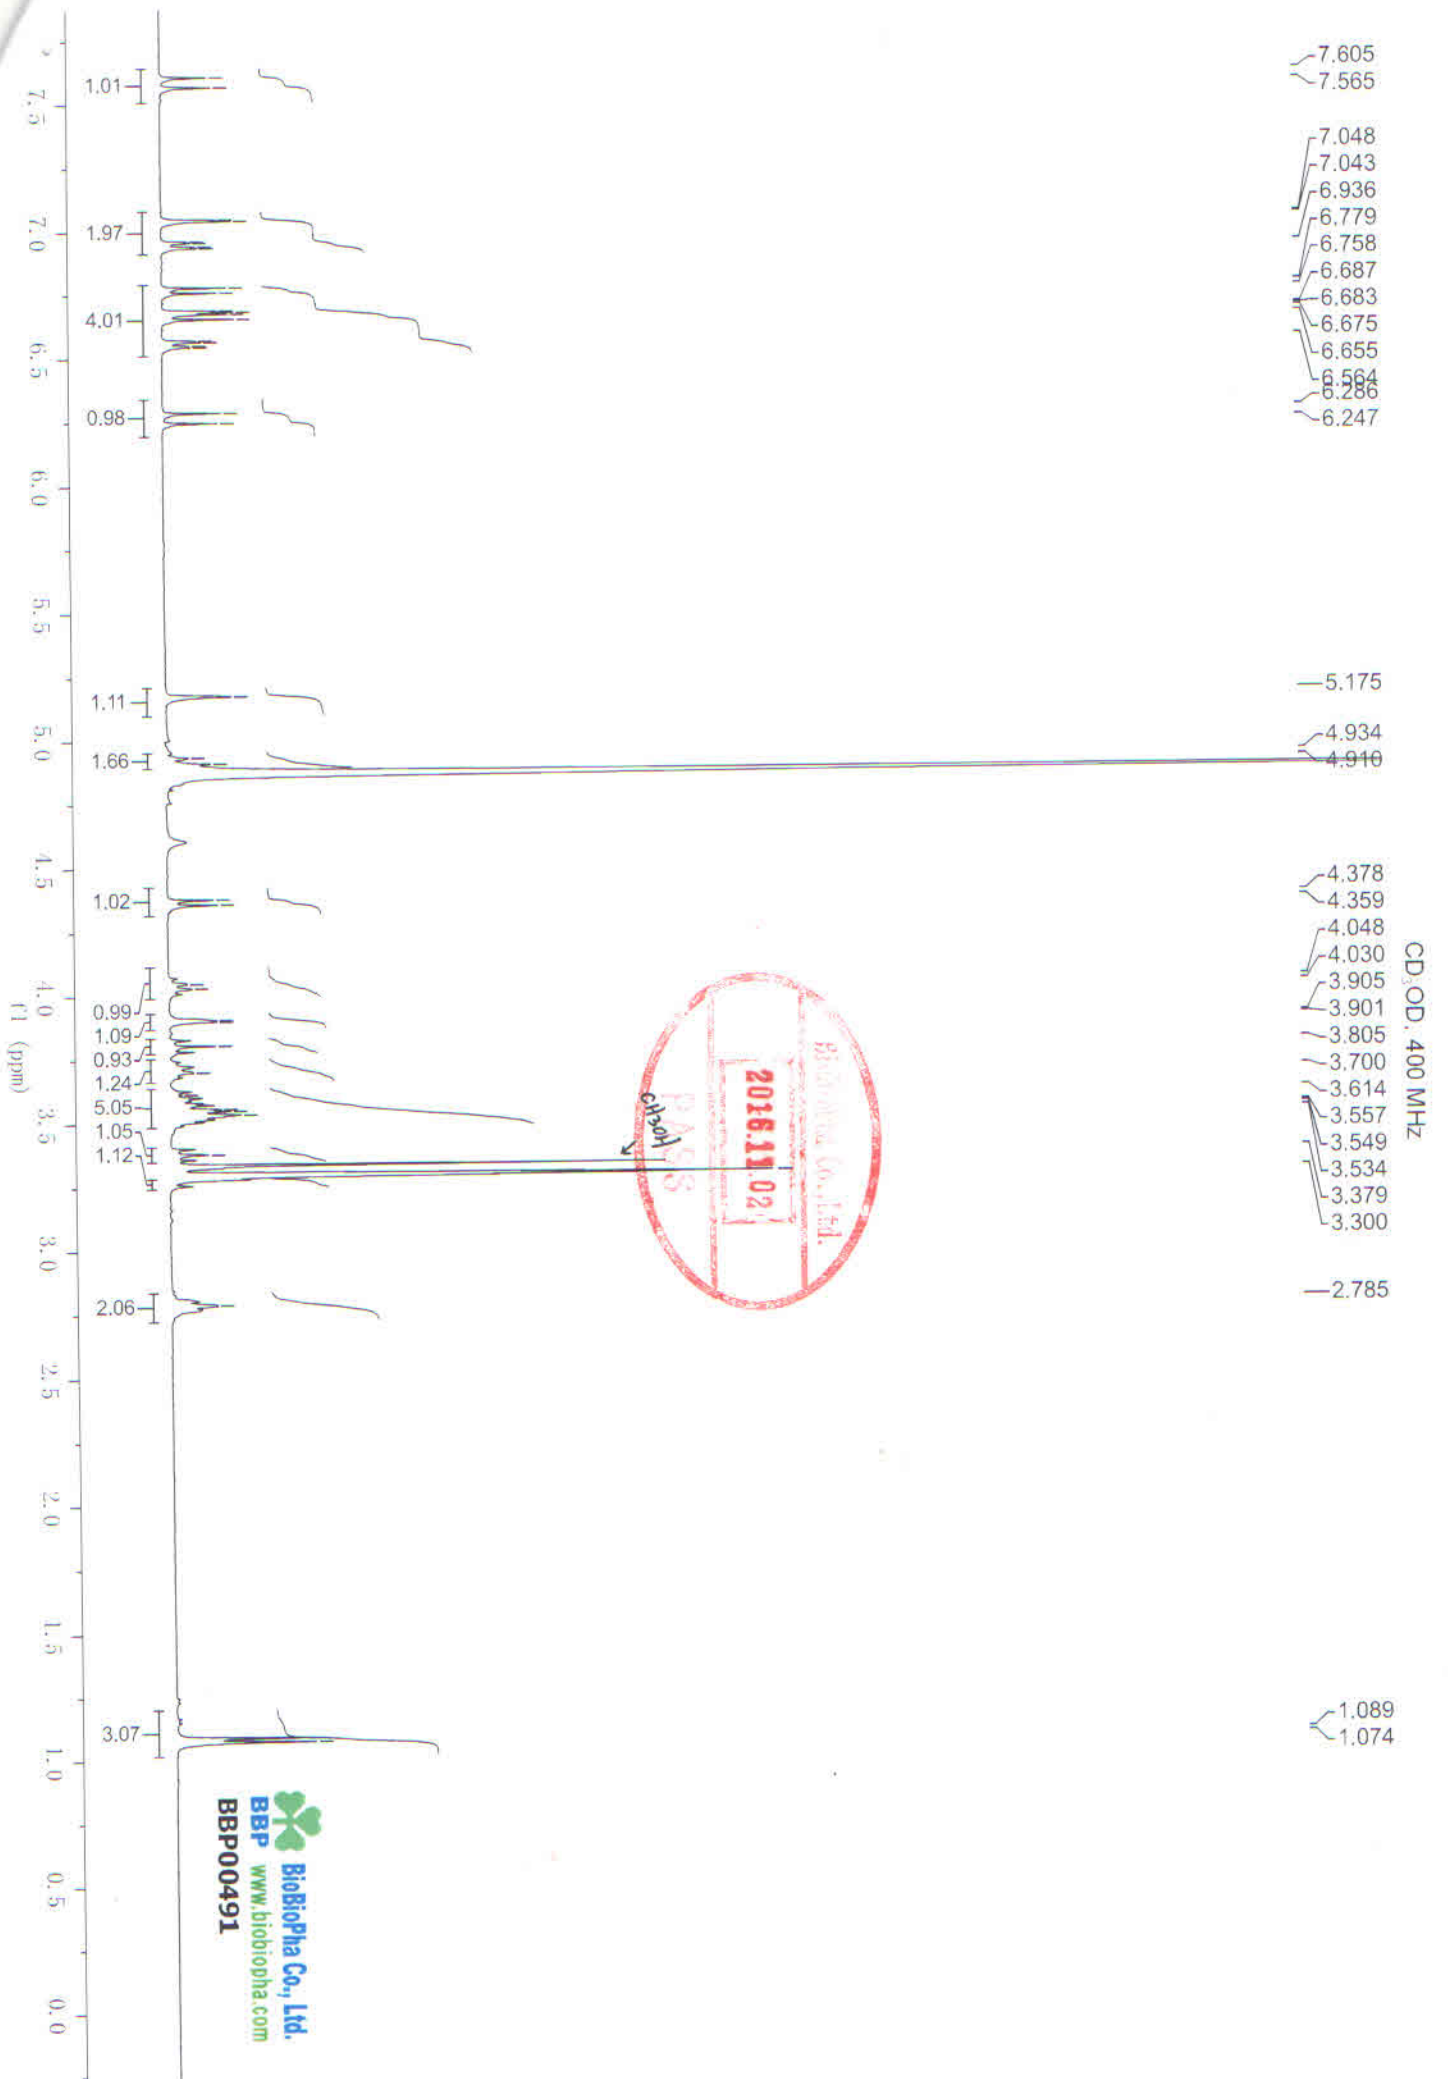

## CERTIFICATE OF ANALYSIS

**BBP No.:** BBP04578

**CAS No.:** 81525-13-5

**Chemical Name:** Forsythoside B

**Molecular Formula:** C<sub>34</sub>H<sub>44</sub>O<sub>19</sub>

**Structure:**

**Purity:** 97%

**Appearance:** Powder

**Solvent:** Methanol

**Exact Weight:** 5.1 mg

**Storage:** Store in a dark place under the temperature of 0-4 °C

**Intended Use:** For laboratory use only

**Reference:** I. Calis, Phytochemistry, 1992, 31(10), 3624-3626

**Warm Notice:** When publishing, please cite as: chemical name was purchased from BioBioPha Co., Ltd. (Kunming, China)

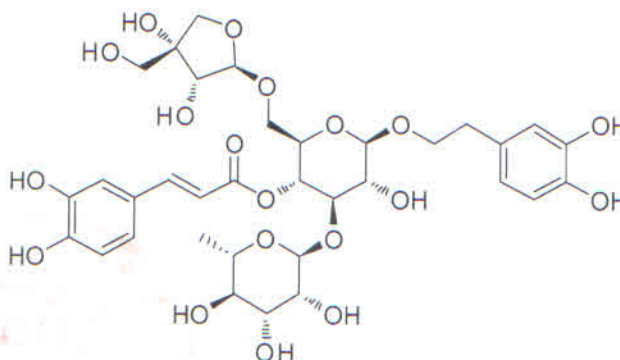

### Characterization Data Summary

| Analytical Test                           | Results                             |
|-------------------------------------------|-------------------------------------|
| Identification by <sup>1</sup> H-NMR      | Consistent with the above structure |
| Purity tested by HPLC, <sup>1</sup> H-NMR | 97%                                 |

**Authorized Signature:**

**Date:** 2016.11.2

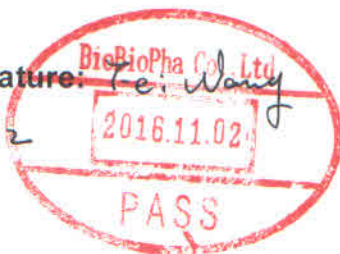

## PRODUCT QUALITY REPORT

Product Number: BBP04578

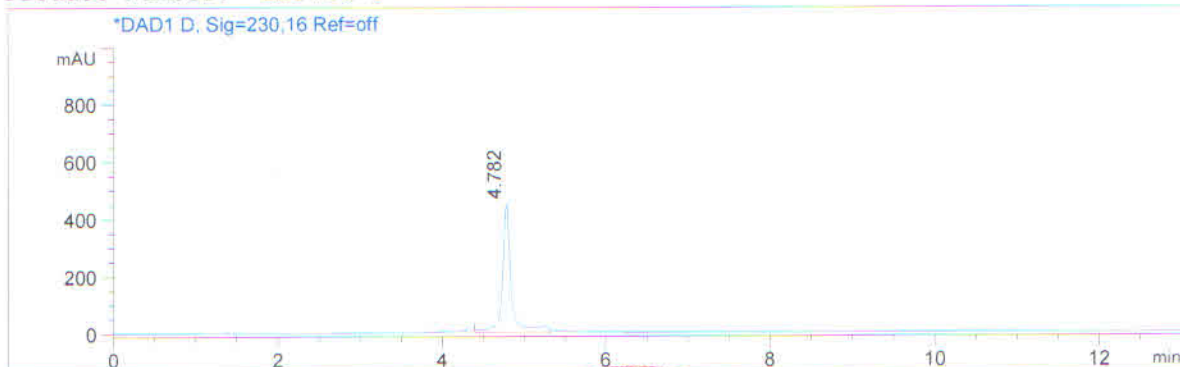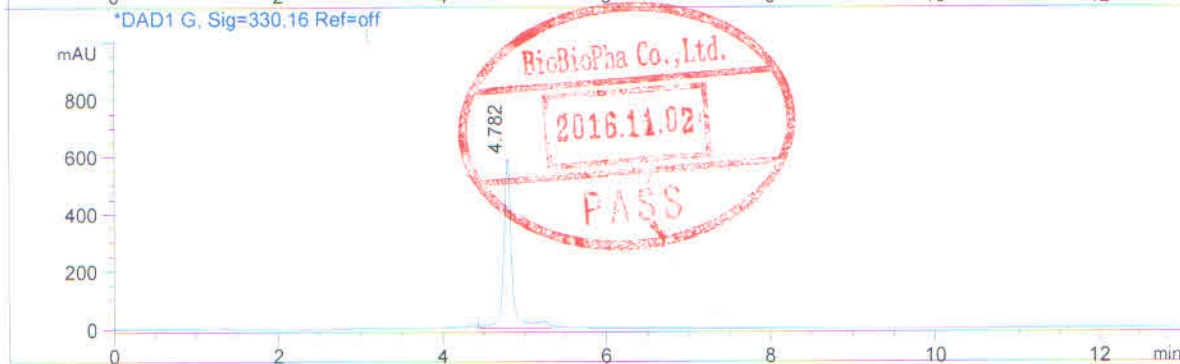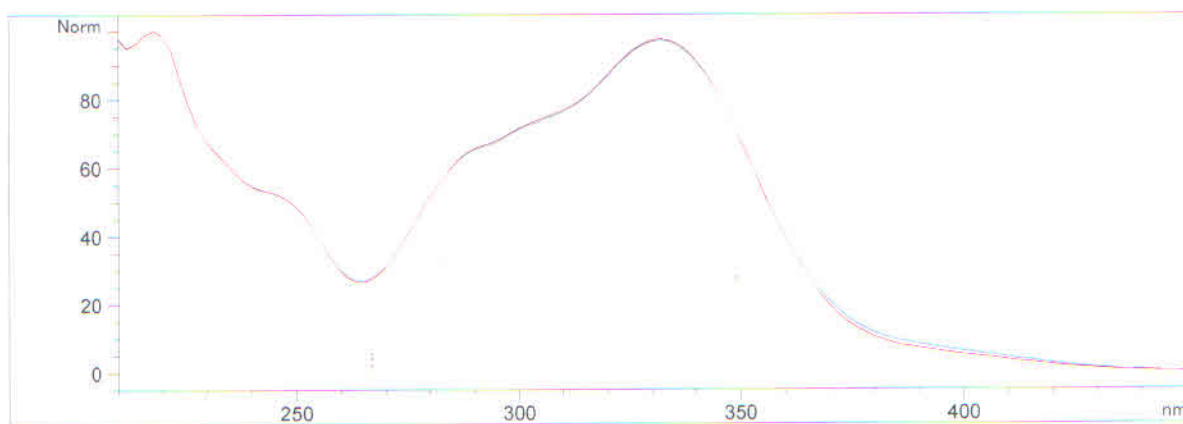

Agilent 1200 series HPLC system  
Extend-C18 column (5  $\mu$ m, 4.6  $\times$  150 mm)  
20%  $\rightarrow$  100% MeOH in H<sub>2</sub>O over 8.0 min followed by 100% MeOH to 13.0 min  
1.0 ml/min, 20°C

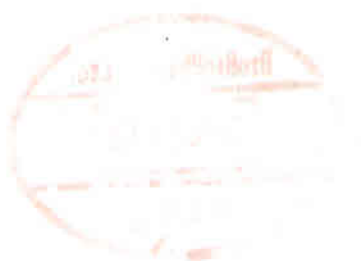



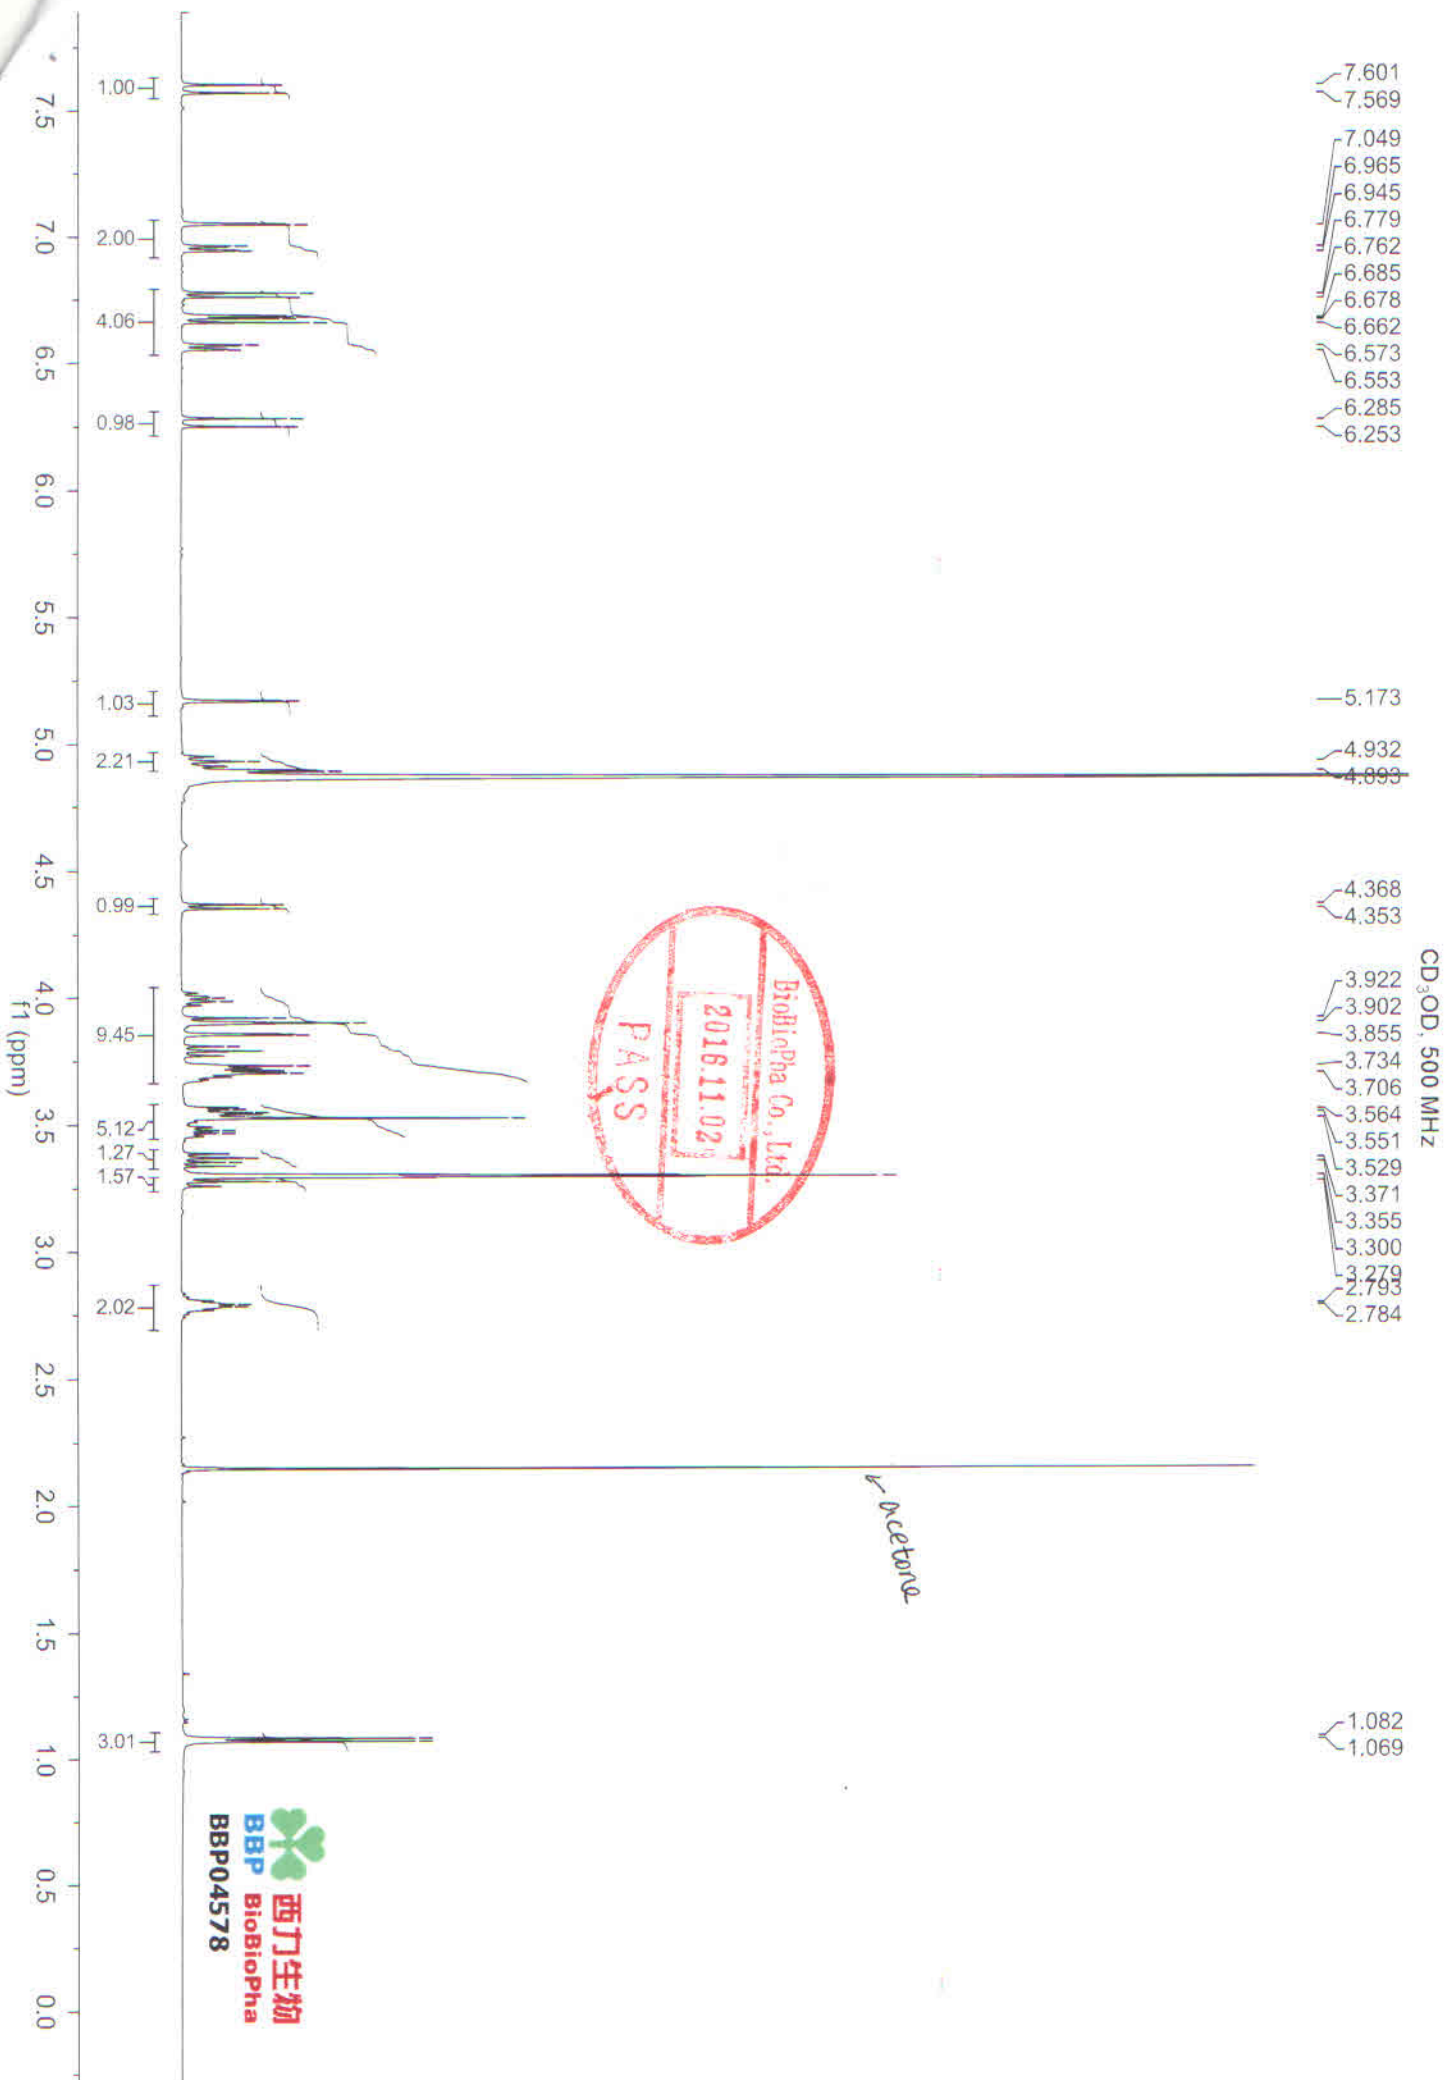

## poliumoside 0.5mg/mL

谱图文件:C:\浙大智达\N2000\样品\poliumoside.dat

报告时间: 2017-12-13, 22:34:57

积分方法: 面积归一法

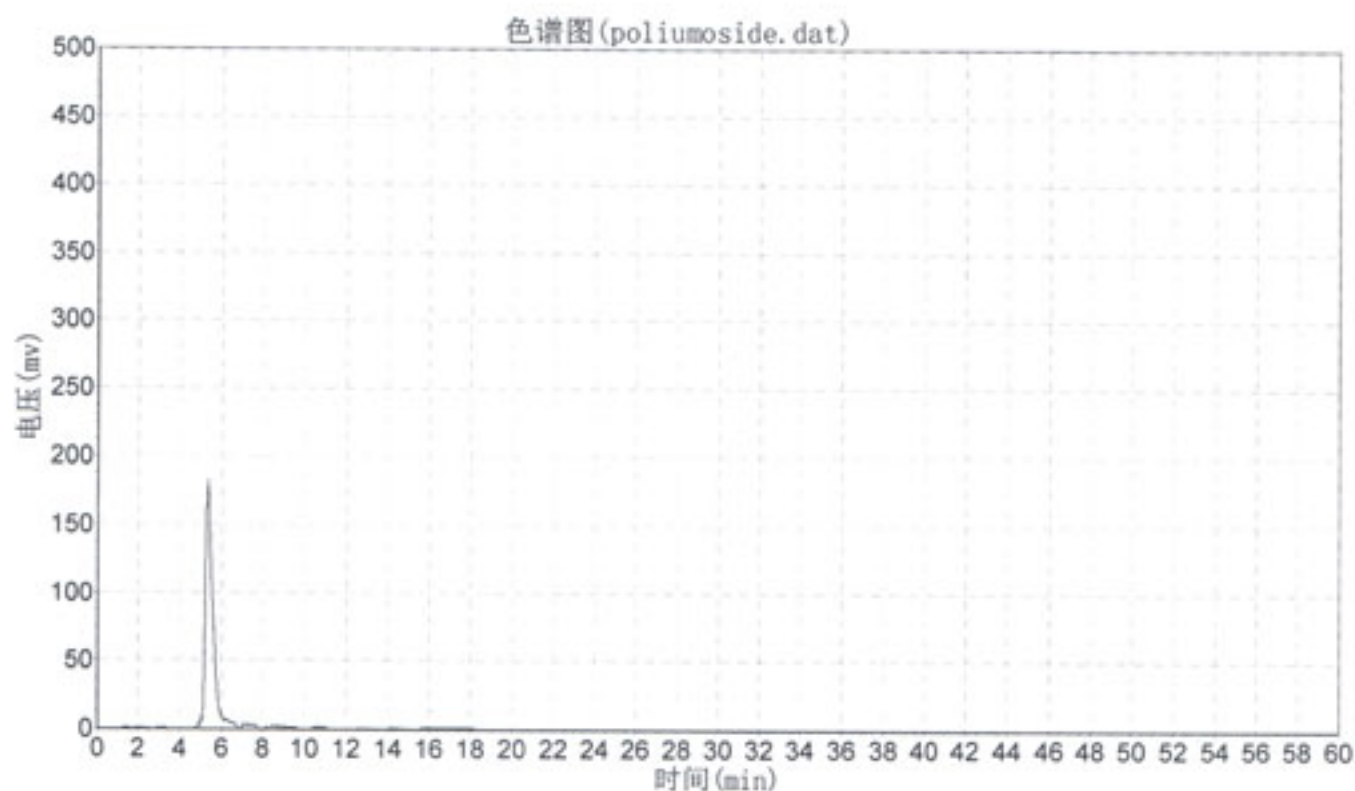

分析结果表

| 峰号 | 峰名 | 保留时间  | 峰高         | 峰面积         | 含量       |
|----|----|-------|------------|-------------|----------|
| 1  |    | 4.973 | 8757.696   | 123533.969  | 2.7519   |
| 2  |    | 5.348 | 180670.422 | 4365471.500 | 97.2481  |
| 总计 |    |       | 189428.118 | 4489005.469 | 100.0000 |

HPLC system equipped with a UV30 detector (Sytech P510 HPLC, Los Angeles, USA)

Diamondsil C18 column (250 mm×4.6 mm, 5 μm, Dikma Ltd., China). Wavelength 332 nm; Mobile MeOH: H<sub>2</sub>O=30:70

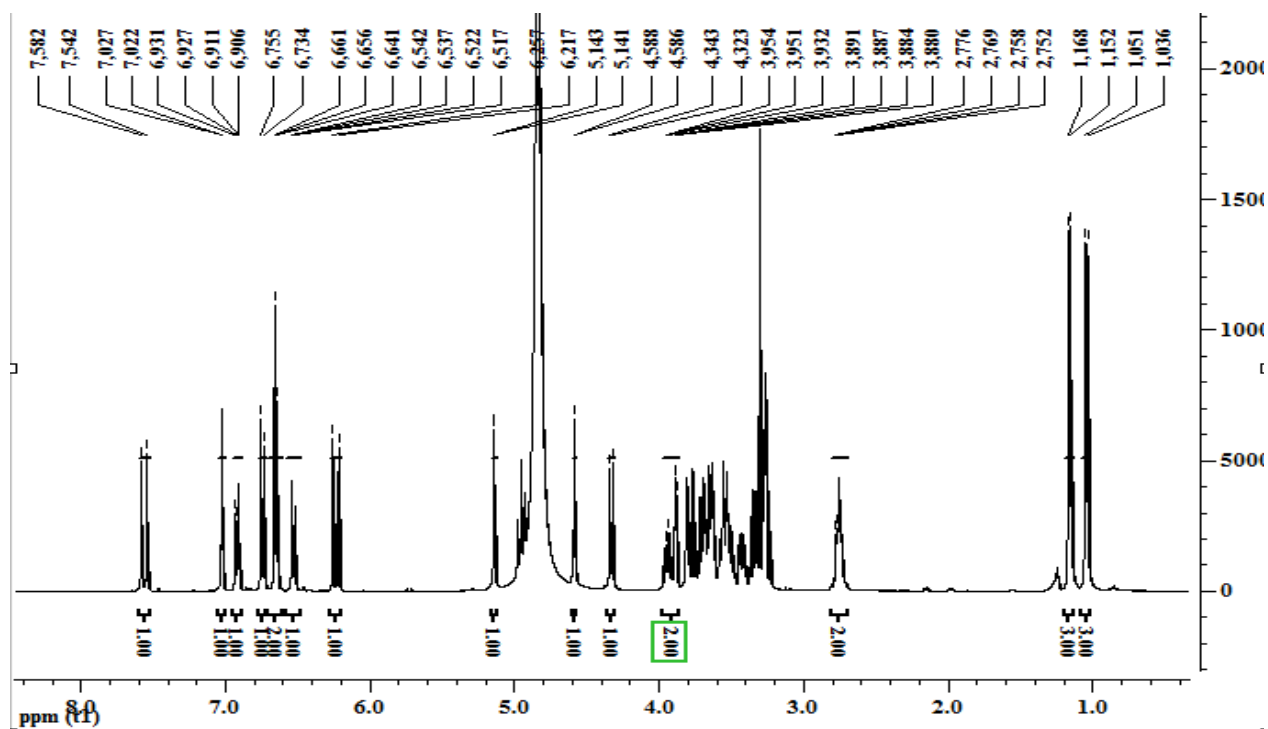

Fig.1 The  $^1\text{H}$  NMR spectrum of poliumoside

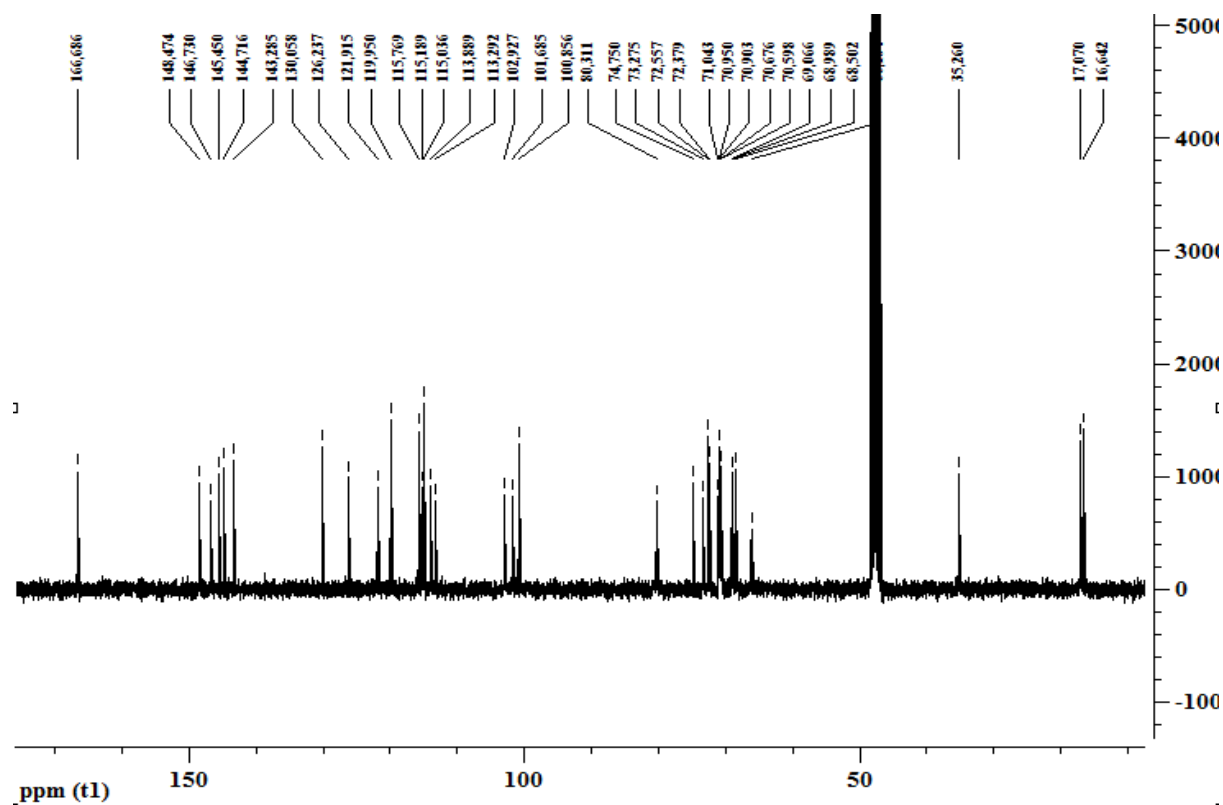

Fig.2 The  $^{13}\text{C}$  NMR spectrum of poliumoside



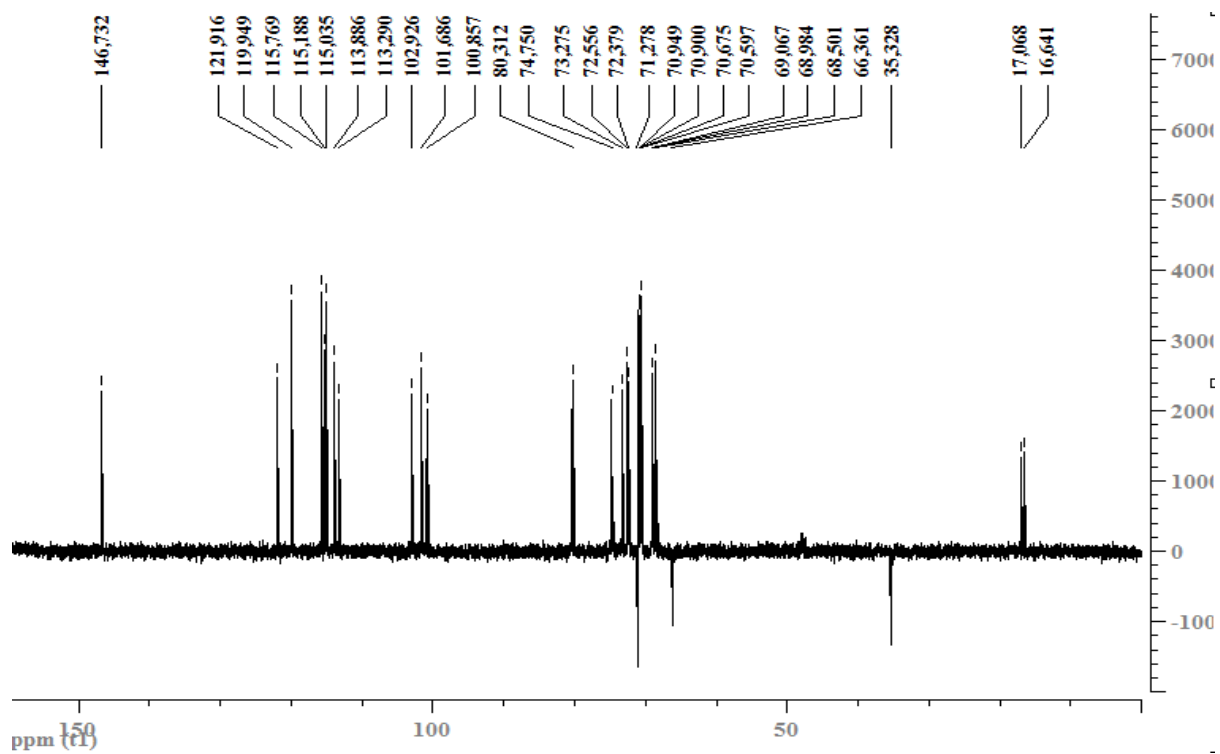

Fig.3 The  $^{13}\text{C}$  NMR DEPT-135 spectrum of poliumoside
